# Supplementary material for: Real-World Impact of Immune Checkpoint Inhibitors in Metastatic Uveal Melanoma
Source: PubMed Central journal article supplement (PMC6826482; doi:10.3390/cancers11101489), 2019-10-03
Supplement: cancers-11-01489-s001.pdf [file cancers-11-01489-s001.pdf]

## Supplementary Materials

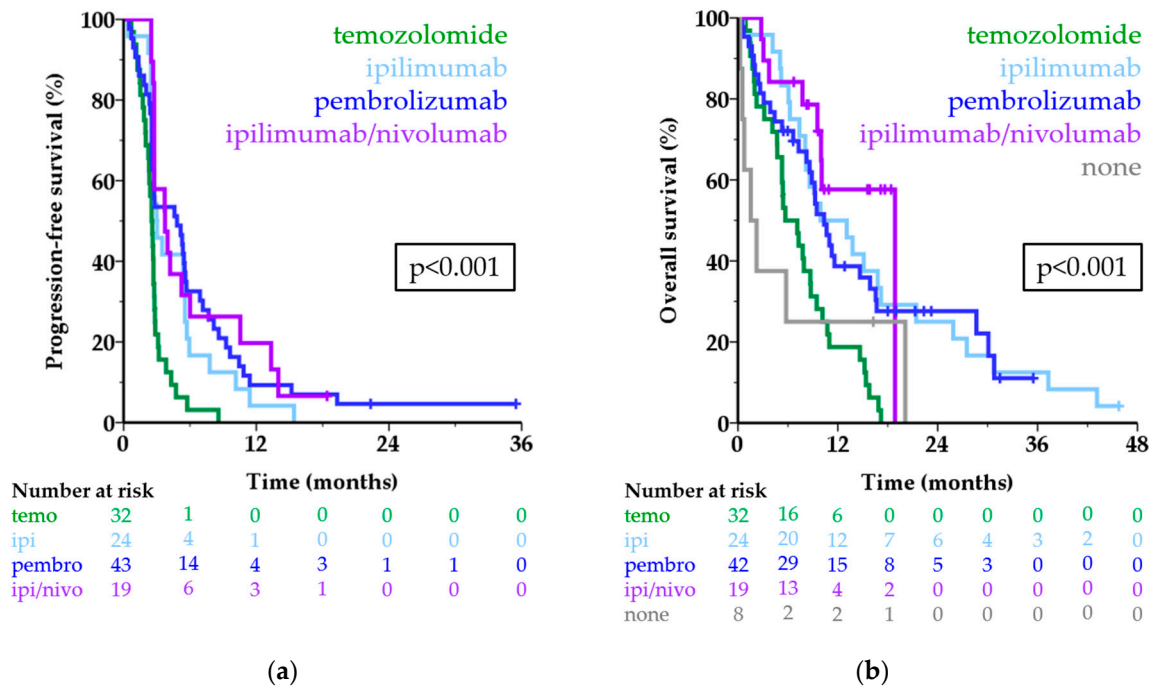

**Figure S1.** Survival per first-line treatment. Kaplan-Meier curves showing progression-free survival (a) and overall survival (b) per first-line treatment (temozolomide in green, ipilimumab in light blue, pembrolizumab in dark blue, combined ipilimumab/nivolumab in purple, no systemic treatment in grey) in months for metastatic uveal melanoma patients. The numbers below the figures denote the number of patients 'at risk' in each group.
